# Supplementary material
Source: Springer Nature journal article supplement (https://www.springermedizin.de/resource/supplementary/12958_2009_636_MOESM5_ESM.pdf/9568358)

## Healthy follicle

## Atretic follicle

Anti-sense

Sense

Anti-sense

Sense

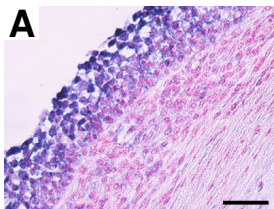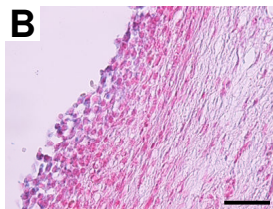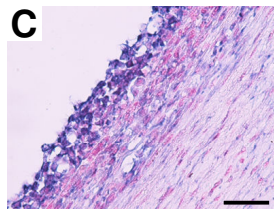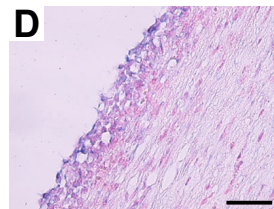

**AMH**

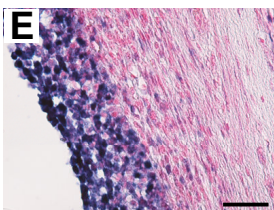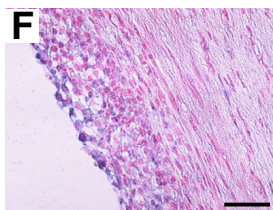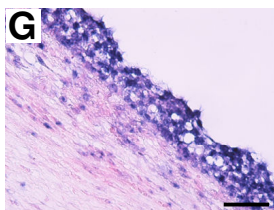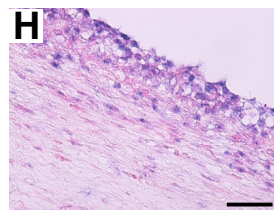

**CYP19**

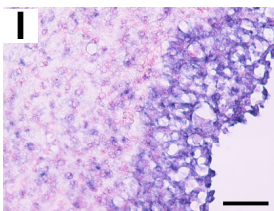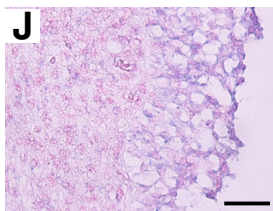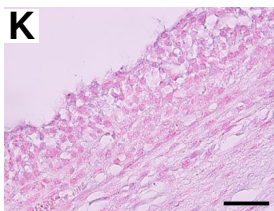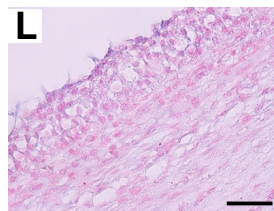

**PIGF**

Supplement: MOESM5 [file 9568358]
